# Supplementary material for: Postpartum depressive symptoms following implementation of the 10 steps to successful breastfeeding program in Kinshasa, Democratic Republic of Congo: A cohort study
Source: PLoS Med. 2021 Jan 11;18(1):e1003465. doi: 10.1371/journal.pmed.1003465 (PMC7799755; doi:10.1371/journal.pmed.1003465)
Supplement: S1 Data — (XLSX) [file pmed.1003465.s006.xlsx]

## Sheet: key
Postpartum depressive symptoms following implementation of the ten steps to successful breastfeeding program in Kinshasa, Democratic Republic of Congo: a cohort study
Robert Agler, Paul Zivich, Bienvenu Kawende, Frieda Behets, Marcel Yotebieng
Variable	Definition
id	study assigned ID
group	treatment arm assignment (1: SOC, 2: step 1-9, 3: step 1-10)
clinic	clinic identifier
epds_score	depression assessed at week 14 via Edinburgh Postnatal Depression Scale
epds_dep	depression categorization based on transformed scores
exclude_reviewer	indicator for reviewer who potentially flipped EPDS scale scores
diff_n_week10	number of breastfeeding difficulties at week 10
diff_week10	any self-reported difficulties breastfeeding (0: no, 1: yes)
ebf_week10	exclusive breastfeeding at week 10 (0: no, 1: yes)
ebf_percent_week10	proportions of breastfeeding at week 10
age	self-report maternal age at enrollment
education	educational attainment at baseline (1: primary, 0: secondary or higher)
marital	marital status at baseline (0: married/live-in boyfriend, 1: never married/separated/divorced)
parity	previous children (0: first child, 1: at least one previous child)
miscarriage	previous miscarriage/abortion/stillbirth (0: no, 1: yes)
wantpregnancy	wanting additional children (0: no, 1: yes)
ancvisits	at least 4 visits to antenatal clinics before delivery (0: no, 1: yes)
violence	previous experiences of domestic violence (0: no, 1: yes)
toilet	flush toilet facility (0: no, 1: yes)
ownhouse	home ownership (0: no, 1: yes)
babygiven	baby given right after delivery at clinic (0: no, 1: yes)

## Sheet: data
ID	group	toilet	ownhouse	ancvisits	parity	marital	babygiven	education	diff_week10	diff_n_week10	epds_score	epds_dep	ebf_percent_week10	ebf_week10	miscarriage	wantpregnancy	violence	age
104001	1	0	1	0	1	0	1	0	1	2	11	0	0.8	0	0	0	0	25
104002	1	0	1	1	0	0	0	0						0	0	0	0
104003	1	1	1	1	0	0	0	0	1	3	13	1	0.75	0	0	0	0	19
104004	1	0	1	1	0	0	0	0	1	3			0.8	0	0	1	0	23
104005	1	1	1	0	1	1	0		1	3	14	1	0.75	0	0	0	1	35
104006	1	0	1	1	1	0	0	1	1	4	9	0	1	1	1	1	0	26
104007	1	0	0	0	1	0	0	1	1	3	17	1	0.818182	0	1	0	1	25
104008	1	0	1	1	1	0	0	0	1	3	5	0	1	1	1	1	0	32
104009	1	0	1	1	1	0	0	0						0	1	1	0	25
104010	1	0	0	1	1	0	0	0	1	3	7	0	0.875	0	0	1	0	28
104011	1	0	1	1	1	0	0	0	1	3	17	1	1	1	0	1	0	27
104012	1	0	0	0	1	0	0	0	1	2	6	0	1	1	0	1	0	24
104013	1	0	1	1	1	0	0	1	1	3	19	1	0.769231	0	0	0	1	31
104014	1	0	1	1	1	0	0	0	1	3	15	1	1	1	0	1	0	27
104015	1	1	1	1	1	0	0	0	1	3	11	0	1	1	0	0	0	36
104016	1	1	0	0	1	0	0	0	1	2	12	0	0.882353	0	1	0	0	33
104017	1	0	0	0	1	0	0	0	1	2			0.882353	0	0	1	0	25
104018	1	0	0	0	1	0	0		1	2			0.769231	0	0	1	0
104019	1	0	1	0	0	1	0	0	1	3	12	0	0.985915	0	0	0	1	22
104020	1	0	1	1	1	0	0	1						0	0	0	0	29
104021	1	0	1	0	1	0	0	0						0	0	1	0	20
104022	1	0	1	0	1	1	0	1	1	2	20	1	0.882353	0	0	1	0	26
104023	1	0	0	1	0	1	0	1	1	3	11	0	0.769231	0	0	0	0	19
104024	1	0	1	0	1	0	0	0						0	0	0	0	41
104025	1	0	1	0	1	0	0	0	1	3	6	0	1	1	1	1	1	34
104026	1	0	1	1	1	0	0	1	1	3	16	1	1	1	0	0	0	35
104027	1	0	1	1	1	0	0	0	1	0	15	1	0.909091	0	1	1	1	24
104028	1	0	1	0	1	0	0		1	3	19	1	0.705882	0	0	1	0
104029	1	0	0	0	1	0	0	0	1	3	9	0	1	1	1	1	0	37
104030	1	0	1	1	1	0	0	0	1	2	16	1	0.769231	0	0	1	0	32
104031	1	0	1	1	0	0	0	0						0	0	1	1	22
104032	1	1	0	0	1	0	0	0	1	3	14	1	0.857143	0	1	1	0	24
104033	1	0	1	1	0	0	0	0	1	3	10	0	1	1	0	1	0	20
104034	1	0	1	0	1	0	0	1						0	0	0	0	27
104035	1	0	0	1	1	0	0	1	1	3	6	0	0.75	0	0	1	0	23
104036	1	1	1	1	0	0	0	0	1	2	8	0	1	1	0	1	0	27
104039	1	0	0	1	0	0	0	0	1	3	8	0	0.882353	0	0	1	1	25
104040	1	0	1	1	1	0	0	0	1	3	16	1	0.972222	0	0	1	0	24
104041	1	0	0	1	1	0	0	0	1	3	8	0	1	1	0	1	0	29
104042	1	0	0	1	1	0	0	0	1	2	15	1	0.9	0		1	1	34
104043	1	0	0	1	1	0	0	1	1	2	24	1	0.833333	0	0	1	1	31
104044	1	0	0	0	1	0	0	0	1	3	11	0	1	1	0	1	0	33
104045	1	0	1	0	1	0	0	0	1	3	14	1	0.875	0	1	1	0	42
104046	1	0	0	0	1	0	0	0	1	2	17	1	0.789474	0	0	1	0	25
104047	1	1	1	1	1	0	0	0	1	3	13	1	1	1	0	1	0	37
104048	1	0	1	0	1	0	0	0	1	3	22	1	0.846154	0	1	0	0	30
104049	1	0	1	1	1	0	0		1	2			0.8	0	1	1	1
104050	1	0	1	1	1	0	0		1	3			0.833333	0	0	1	1	25
104051	1	0	1	0	0	1	0	0	1	2	13	1	0.833333	0	0	0	0	19
104052	1	0	1	0	1	0	0	0	1	3	13	1	1	1	0	1	0	28
104053	1	0	1	0	1	0	0	0	1	2	9	0	1	1	0	1	1	35
104054	1	0	0	0	1	0	0	0	1	2			0.75	0	0	1	0	26
104057	1	0	1	1	1	0	0	1	1	3	19	1	0.909091	0	0	1	1	34
104058	1	0	1	1	1	1	0	0	1	3	3	0	1	0	0	1	0	26
104059	1	0	0	1	1	0	0	0	1	3	10	0	0.857143	0	1	0	1	27
104060	1	1	0	0	1	0	0	0	1	3	16	1	0.833333	0	0	1	1	34
104061	1	0	1	1	1	0	0	0	1	3	10	0	0.882353	0	0	1	1	26
104062	1	0	1	0	1	0	0	0	1	3	11	0	0.833333	0	1	1	1	36
104063	1	0	1	1	1	0	0	0	1	3	9	0	1	0	0	1	1	24
104064	1	0	1	1	1	0	0	0	1	2	8	0	0.909091	0	0	1	1	36
104065	1	0	0	1	1	0	0	0	1	3	14	1	1	1	1	1	1	32
104066	1	0	0	1	1	0	0	0						0	0	1	1	26
104067	1	0	0	1	1	0	0	0	1	2	13	1	0.923077	0	0	1	0	35
104068	1	0	1	1	1	0	0	0	1	0	16	1	1	1	1	1	0	29
104069	1	0	1	1	0	0	0	0	1	3	6	0	0.8	0	0	1	0	19
104070	1	0	1	1	1	0	0	1	1	3	12	0	1	1	0	1	1
104071	1	1	1	1	1	0	0	0	1	3	0	0	0.65	0	0	1	1	25
104072	1	0	1	1	1	0	0	0	1	3	21	1	0.9375	0	0	1	1	35
104073	1	0	1	1	0	0	0	1	1	3	12	0	0.714286	0	0	0	0	26
104074	1	0	1	0	1	0	0	0						0	1	1	1	29
104075	1	0	1	0	1	0	0	1	1	2	10	0	1	1	0	1	1	41
104076	1	0	1	0	1	0	0	0	1	3	3	0	0.866667	0	0	1	1	38
104077	1	0	1	0	1	0	0	0	1	3	13	1	0.9	0	0	0	1	39
104078	1	0	0	0	1	0	0	1	1	3	0	0	1	1	1	1	0
104079	1	0	1	0	1	0	0	1	1	2			0.666667	0	0	1	1	28
104080	1	0	1	0	1	0	0	0	1	3	7	0	1	1	0	0	0	22
104081	1	0	0	1	0	0	0	0	1	3	7	0	0.992126	0	1	1	1	27
104082	1	0	1	1	1	0	0	0	1	2	1	0	0.882353	0	1	0	1	34
104083	1	0	1	0	0	0	0	0	1	3			0.769231	0	0	0	0	17
104084	1	0	0	1	1	0	0	0	1	3	10	0	0.9	0	0	1	1	37
104085	1	0	1	1	1	0	0	0	1	2	18	1	1	1	0	1	1	23
104086	1	0	0	0	1	0	0	0						0	0	1	1	27
104087	1	0	0	0	1	0	0	0	1	2	8	0	0.9	0	1	1	1	37
104088	1	0	1	1	1	0	0	1	1	3	6	0	1	1	1	1	1	19
104089	1	0	0	0	1	0	0	0	1	3			1	1	0	1	0	28
104090	1	0	1	1	1	0	0		1	2	0	0	0.882353	0	0	0	1	36
104091	1	1	1	1	0	0	0		1	3	19	1	0.909091	0	0	1	0	19
104092	1	0	1	1	0	0	0	0	1	3	12	0	1	1	1	1	0	18
104093	1	0	0	0	1	0	0	1	1	3	4	0	1	1	0	1	1	31
104094	1	1	0	0	1	0	0	0	1	2	7	0	1	1	0	1	1	24
104095	1	0	0	1	0	0	0	0	1	3	8	0	1	1	0	1	1	18
104096	1	0	1	0	1	0	0	0	1	3	14	1	0.764706	0	0	1	0	38
104097	1	0	0	1	1	0	0	0	1	2	6	0	0.8	0	0	1	0	23
104098	1	0	0	1	1	0	0	0	1	2	0	0	1	1	1	1	1	33
104101	1	0	0	0	1	0	0	0	1	3	0	0	1	1	0	1	1	27
107001	1	0	1	1	0	0	0	0	1	4	8	0	1	1	0	0	0	33
107002	1	0	1	1	1	0	0		1	3			0.692308	0	1	0	0	44
107003	1	1	1	1	0	0	0	0	1	2	11	0	0.8	0	0	0	0	19
107004	1	0	1	1	1	0	0	0	1	2	10	0	1	1	1	0	0	44
107005	1	0	0	1	1	0	0	0	1	2			0.8	0	0	0	0	29
107006	1	0	1	0	1	0	0	0	1	4	9	0	0.933333	0	0	0	1	38
107007	1	1	0	1	0	0	0	0	1	2	12	0	0.952381	0	0	1	0	31
107008	1	0	1	1	0	0	0	1	1	1	13	1	0.976744	0	0	1	0	20
107009	1	0	0	1	1	0	0	0	1	3			0.5	0	0	0	0	34
107010	1	0	1	1	1	0	0	1	1	2			0.769231	0	0	0	0	33
107011	1	0	0	1	1	0	0	0	1	2	12	0	1	1	0	1	0
107012	1	0	1	1	1	0	0	0						0	0	1	0	34
107013	1	0	0	1	1	0	0	0	1	3	12	0	1	1	1	0	1	36
107014	1	1	1	1	0	0	0	0	1	3	2	0	1	1	1	1	0	24
107015	1	1	0	1	1	0	0	0	1	2	3	0	1	1	1	0	0	34
107016	1	0	0	1	1	0	0	0	1	2	8	0	1	1	0	0	0	26
107017	1	0	0	0	1	0	0	0						0	0	0	0	29
107018	1	0	1	0	1	0	0	0	1	1	11	0	1	1	0	0	0	33
107019	1	0	1	1	0	1	0	0						0	0	0	0	18
107020	1	0	1	1	1	0	0	0	1	1			1	1	1	0	0	32
107021	1	0	1	1	1	0	0	1						0	1	0	1	35
107022	1	0	1	0	1	0	0	0	1	2	12	0	0.990566	0	1	0	0	26
107023	1	0	0	1	1	0	0	0	1	3	12	0	0.785714	0	0	1	0	40
107024	1	1	0	1	1	0	0	0	1	3	8	0	1	1	1	0	0	30
107025	1	0	1	1	1	1	0	0	1	1			0.882353	0	0	0	0	22
107026	1	0	1	0	1	0	0	0	1	2	11	0	0.857143	0	0	0	0	21
107027	1	0	1	0	1	0	0	0	1	2	3	0	0.769231	0	0	0	0	18
107028	1	0	1	1	1	1	0	0	1	3	15	1	1	1	1	0	1	31
107029	1	0	1	1	1	1	0	0	1	2	10	0	0.769231	0	0	0	1	22
107030	1	1	0	0	1	0	0	0	1	2	4	0	1	1	0	1	0	40
107031	1	0	1	0	1	1	0	0	1	2	9	0	1	1	1	0	1	27
107032	1	0	1	0	1	0	0	0						0	0	1	1	20
107033	1	0	0	1	1	0	0	0	1	2	13	1	1	1	0	1	0	33
107034	1	0	1	1	1	0	0	0	1	2	9	0	0.969231	0	0	0	0	35
107035	1	0	0	1	1	0	0	0	1	3	10	0	1	1	1	1	0	40
107036	1	1	0	1	0	0	0	0	1	3	6	0	1	1	0	0	0	20
107037	1	0	1	0	1	0	0	0	1	3	5	0	0.75	0	0	0	0	23
107038	1	1	0	0	0	1	0	0	1	2			1	1	0	0	0	22
107039	1	0	1	1	0	0	0	0	1	3	10	0	0.857143	0	1	1	0	28
107040	1	1	1	0	1	0	0	0	1	3	12	0	0.646154	0	1	1	0	37
107041	1	0	1	0	1	0	0	0	1	3	7	0	1	1	0	0	0	34
107042	1	0	0	0	1	0	0	0	1	2			0.6	0	1	0	0	41
107043	1	0	0	0	1	0	0	0	1	4	11	0	0.666667	0	0	0	1	34
107044	1	0	1	0	0	1	0	0	1	2	10	0	1	1	0	0	0	18
107045	1	0	0	1	1	0	0		1	3	7	0	1	1	1	0	0	26
107046	1	0	0	0	0	1	0	0	1	3	9	0	0.833333	0	0	0	0	18
107047	1	0	1	0	1	0	0	1	1	2	4	0	0.769231	0	1	1	1	25
107048	1	0	1	1	1	0	0	0	1	2	10	0	1	1	1	0	1	38
107049	1	0	1	1	1	0	0	0	1	3	10	0	1	1	0	0	0	29
107050	1	0	1	1	1	0	0	0	1	3	9	0	0.928571	0	0	1	0	24
107051	1	0	1	1	1	0	0	0	1	2			1	1	1	1	0	39
107052	1	0	0	1	0	0	0	0	1	4	9	0	1	1	0	1	0	27
107053	1	0	0	0	0	0	0	0	1	3			0.666667	0	0	0	1	21
107054	1	0	1	1	1	0	0	1	1	3	7	0	0.833333	0	0	0	1	21
107055	1	0	0	0	1	0	0	0						0	1	1	0	36
107056	1	1	0	1	1	0	0	0	1	2	8	0	1	1	0	1	0	18
107057	1	0	1	1	1	0	0	0	1	2	0	0	1	1	1	1	0	26
107058	1	0	0	0	1	0	0	0	1	3	10	0	1	1	0	0	0	26
107059	1	0	0	1	1	0	0	0	1	3	12	0	0.578512	0	0	0	0	28
107060	1	0	1	0	1	0	0	1	1	2			0.6	0	0	0	0	36
107061	1	0	0	0	1	0	0	0	1	4	9	0	0.8	0	1	0	1	24
107062	1	0	0	0	1	0	0	0	1	2	8	0	0.875	0	0	0	0	22
107063	1	0	1	1	1	1	0	1	1	2	11	0	0.75	0	0	1	0	23
107064	1	0	0	0	1	0	0	0	1	3			0.833333	0	0	0	0	32
107065	1	0	0	1	1	0	0	0	1	3	8	0	1	1	0	1	0	41
107066	1	0	0	1	1	0	0	0	1	3	4	0	1	1	1	0	0	33
107067	1	0	0	1	1	0	0	0	1	3	10	0	1	1	1	1	0	27
107068	1	0	1	1	1	0	0	0	1	2	8	0	0.846154	0	1	1	0	32
107069	1	0	0	1	0	0	0	0	1	3	13	1	1	1	0	1	1	19
107070	1	0	1	0	1	0	0	0	1	3	10	0	1	1	0	0	0	22
107071	1	0	1	1	1	0	0	1						0	0	1	0	23
107072	1	1	1	1	0	0	0	0	1	3	11	0	1	1	0	0	0	20
107073	1	0	0	1	1	0	0	0	1	2	21	1	1	1	0	0	0	27
107074	1	0	0	1	0	1	0	0	1	3	12	0	0.666667	0	0	1	0	25
107075	1	1	0	1	0	0	0	0	1	3	9	0	0.777778	0	0	1	0	25
107076	1	0	1	1	1	1	0	1	1	3	12	0	0.6	0	0	0	0	27
107077	1	1	1	1	1	0	0	0	1	2	8	0	0.882353	0	0	0	0	31
107078	1	0	0	1	1	0	0	0	1	3	5	0	0.666667	0	0	1	0	34
107079	1	0	1	0	1	0	0	0	1	3	13	1	0.882353	0	0	0	0	33
107080	1	0	0	1	1	0	0		1	2	11	0	1	1	0	0	0	43
107081	1	0	0	0	1	1	0	0	1	3	11	0	0.769231	0	1	1	0	28
107082	1	0	1	1	0	0	0	0	1	3	8	0	1	1	1	0	0	21
107083	1	1	1	1	0	0	0	0	1	3	6	0	1	1	0	0	0	18
107084	1	0	0	0	1	0	0	0	1	3	10	0	1	1	1	0	0	35
107085	1	0	1	1	0	0	0	0	1	3	15	1	1	1	1	0	0	25
107086	1	1	0	1	1	0	0	0	1	3	10	0	0.909091	0	1	0	0	30
107087	1	0	0	1	0	0	0	1	1	2	10	0	0.75	0	0	0	0	20
107088	1	0	1	0	1	1	0	0	1	3	9	0	1	1	0	0	0	24
107089	1	0	1	0	1	0	0	0	1	4	8	0	0.818182	0	0	0	0	22
107090	1	1	1	0	1	0	0	0	1	2	9	0	0.833333	0	0	1	0	41
107091	1	0	0	1	1	0	0	0	1	3	6	0	1	1	0	1	0	30
107092	1	0	0	0	1	0	0	0	1	1	13	1	0.833333	0	0	0	0	36
107093	1	0	1	1	1	0	0		1	3	11	0	0.666667	0	1	1	0	28
107094	1	0	1	1	0	1	0	0	1	3	6	0	0.5	0	0	0	0	19
107095	1	1	0	0	1	0	0	0	1	2	7	0	0.571429	0	0	0	1	28
107096	1	0	1	1	0	0	0	0	1	4	6	0	0.857143	0	0	0	0	18
107097	1	0	0	1	1	0	0	0	1	2	9	0	0.625	0	0	0	0	32
107098	1	0	1	1	1	0	0	0	1	2	6	0	0.727273	0	0	0	0	35
107099	1	0	0	0	1	0	0	0	1	3	10	0	1	1	0	0	0	23
107100	1	0	1	0	1	0	0	0	1	3	4	0	0.714286	0	0	1	0	30
205002	2	0	0	0	0	0	0	0	0	0			1	1	0	0	0	27
205003	2	0	0	1	1	0	1	0	0	0			0.8	0	0	0	0	30
205004	2	0	0	0	1	0	1	0	0	0			1	1	0	1	0	31
205005	2	0	0	0	1	0	0	1	0	0			1	1	1	0	1	33
205006	2	0	0	0	1	0	0	0	0	0			1	1	0	1	0	27
205007	2	0	0	1	1	0	1	0	0	0			1	1	1	1	0	27
205008	2	0	0	1	1	0	1	1	0	0			1	1	0	0	0	26
205009	2	0	1	0	0	0	1	0	0	0			0.909091	0	0	0	1	24
205010	2	0	0	0	1	0	1	1	0	0			1	1	0	0	0	28
205011	2	1	0	0	1	0	1	1	0	0				0	0	0	0	27
205012	2	1	0	1	1	0	1	1	0	0			1	1	1	0	0	25
205013	2	0	1	1	1	0	1	0	1	2			0.4	0	0	0	1	23
205014	2	0	1	0	1	1	1		0	0			1	1	0	0	1	26
205015	2	1	1	0	1	0	1	0	0	0			0.952381	0	0	0	0	20
205016	2	0	1	0	1	0	1	0	0	0			1	1	1	0	0	25
205017	2	0	0	0	1	0	1	1	0	0			1	1	0	1	1	27
205018	2	0	1	0	1	1	1	1	0	0			0.952381	0	1	0	0	25
205019	2	0	0	1	1	0	1	0	0	0			0.909091	0	0	0	1	31
205020	2	0	0	0	0	0	1	0	1	1			1	1	1	1	1	20
205021	2	0	1	0	1	0	1	0	0	0			0.833333	0	0	0	0	29
205022	2	0	1	0	1	0	1	1	0	0			1	1	0	0	0	29
205023	2	0	0	0	1	0	1		0	0			0.9	0	1	0	0
205024	2	0	1	1	0	0	1	1	0	0			1	1	1	1	0	20
205025	2	0	1	0	1	0	0	0	0	0			1	1	0	1	0	20
205026	2	0	0	0	1	0	1	0	0	0			1	1	1	1	0	18
205027	2	1	1	0	0	0	1	0	0	0			1	1	0	0	0	21
205028	2	0	1	0	1	1	0							0	0	0	0	21
205029	2	0	1	1	0	1	1	0						0	0	0	0	19
205030	2	1	0	0	1	0	1	1	0	0			1	1	1	1	0	35
205031	2	1	0	1	1	0	1	0	0	0			1	1	1	1	0	30
205032	2	0	1	0	1	1	1	0	0	0			1	1	1	0	0	21
205033	2	0	0	1	1	0	1	1	0	0			1	1	1	1	0	40
205034	2	1	1	0	1	0	1	0	0	0			1	1	0	0	0	30
205035	2	0	0	0	1	0	1		0	0			1	1	0	0	0	25
205036	2	1	1	0	1	0	0	0	1	1			1	1	0	0	0	22
205037	2	0	0	0	1	0	1		0	0			0.9375	0	1	0	0	32
205038	2	0	1	1	1	0	1	0	0	0			1	1	1	1	0	35
205039	2	0	1	0	0	0	1	0	0	0			1	1	0	0	0	18
205040	2	0	1	1	1	0	1	1	0	0			1	1	0	0	0	23
205041	2	1	0	0	1	0	1	0	0	0			1	1	0	1	0	18
205042	2	1	0	0	1	0	1	0	0	0			1	1	0	0	0	34
205043	2	0	1	0	1	1	1	0	0	0			1	1	0	1	0	22
205044	2	0	1	0	1	1	1	0	0	0			1	1	1	0	0	27
205045	2	1	0	0	1	0	1	0	0	0			1	1	0	0	0	24
205046	2	0	0	0	1	0	1	1	0	0			1	1	0	0	0	27
205047	2	0	0	1	1	1	1	1	0	0			1	1	1	0	0	40
205048	2	1	0	1	0	0	1	0	0	0			0.882353	0	0	1	0	22
205049	2	1	0	0	0	0	1	0	0	0			0.882353	0	0	1	0	27
205050	2	0	0	0	0	0	1	1	1	3			1	1	0	0	0	20
205051	2	0	1	1	1	0	1	0	0	0			1	1	0	0	0	34
205052	2	0	0	0	1	0	1	0	0	0			1	1	0	0	0	29
205053	2	0	1	1	0	0	1	0						0	0	1	0	19
205054	2	0	0	1	1	0	1	0	0	0			1	1	1	1	0	33
205055	2	1	1	1	1	0	1	0	0	0			1	1	0	1	0	32
205056	2	0	0	0	1	0	1	1	0	0			1	1	0	0	1	22
205057	2	1	1	1	1	0	1	0	0	0			0.888889	0	1	1	0	33
205058	2	0	1	0	1	0	1	0	1	0			1	1	0	1	0	32
205059	2	0	0	1	1	0	1	0	0	0			1	1	0	1	0	24
205060	2	0	1	0	0	1	1	0						0	0	0	0	19
205061	2	0	0	0	1	0	1	0	0	0			1	1	0	1	0	39
205062	2	0	0	0	1	0	1	0						0	1	1	0	32
205063	2	0	0	0	1	0	1	1	0	0			1	1	0	1	0	20
205064	2	1	0	0	1	0	1	1	0	0			1	1	0	1	0	26
205065	2	0	0	0	1	0	1	1	0	0			0.869565	0	0	1	0	36
205066	2	1	0	0	1	0	1	0	0	0			1	1	0	0	0	24
205067	2	1	1	0	1	0	1	0	0	0			1	1	0	0	0	39
205068	2	0	1	0	1	0	1	0	0	0			1	1	0	0	1	33
205069	2	0	1	0	1	0	1	0						0	0	0	0	34
205070	2	0	1	0	1	0	1	0						0	0	0	1	36
205071	2	0	0	0	0	0	1	0	0	0			1	1	0	1	0	25
205072	2	0	1	0	1	1	1	0	1	2			1	1	0	0	0	27
205073	2	0	1	0	1	1	1	1	0	0			1	1	0	0	0	27
205074	2	0	0	1	1	0	1	1	0	0			1	1	0	0	0	37
205075	2	0	1	1	0	0	1	0	0	0			1	1	0	0	0	19
205076	2	1	1	0	1	0	1	0	0	0			1	1	0	0	0	27
205077	2	0	1	1	1	0	1	0	0	0			1	1	1	1	1	26
211001	2	0	0	0	1	0	1		1	3	8	0	1	0	1	1	0
211002	2	0	0	1	1	0	1	0	1	3	8	0	1	1	0	0	0	27
211003	2	0	1	0	1	1	1	0						0	0	1	0	31
211004	2	0	0	1	1	0	1	1	1	3	9	0	1	1	0	0	0	34
211005	2	0	1	0	1	0	1	0	1	1	8	0	1	0	1	0	0	27
211006	2	1	0	0	1	0	1	1	1	3	7	0	1	1	1	1	0	26
211007	2	0	0	0	1	0	1	1	1	2	6	0	1	1	0	1	0	34
211008	2	1	1	1	0	0	1	0	1	2	21	1	0.909091	0	0	1	0	29
211009	2	0	0	0	1	0	1	0	1	3	6	0	1	0	0	1	0	26
211010	2	0	1	0	1	0	1	0						0	0	1	0	40
211011	2	1	1	1	1	0	1	0	1	2	6	0	1	1	0	0	0	30
211012	2	0	0	0	1	0	1	0	1	1			1	1	1	1	0	23
211013	2	1	0	0	1	0	1	0	0	0	1	0	0.777778	0	0	1	0	26
211014	2	1	1	1	1	0	1	0	1	2			1	1	1	0	1	24
211015	2	1	0	0	0	0	1	0	1	3	11	0	1	1	0	0	0	20
211016	2	1	0	1	0	1	1	1						0	0	1	1	25
211017	2	0	1	0	1	0	1	0						0	1	1	0	31
211018	2	1	1	0	1	0	1	0	1	2	4	0	1	1	1	0	0	42
211019	2	0	0	1	1	0	1	0						0	1	1	0	29
211020	2	0	0	1	1	0	1	0						0	1	1	0	29
211021	2	0	1	0	0	1	1	0	1	3	0	0	1	1	1	0	0	21
211022	2	0	0	1	1	0	1	1	1	1	2	0	1	1	0	1	0	32
211023	2	0	1	1	1	0	1	0	1	3	6	0	1	1	1	1	0	29
211024	2	0	0	0	1	0	1	0	1	3	4	0	1	1	1	1	0	27
211025	2	1	0	0	1	0	1	0	1	2	3	0	0.894737	0	0	1	0	28
211026	2	1	0	0	1	0	1	0	1	2	10	0	1	1	0	1	0	25
211027	2	1	1	1	1	1	1	1	1	2			1	1	0	0	0	26
211028	2	0	1	0	1	0	1	1						0	0	0	0	33
211029	2	0	1	0	1	1	0	0	1	3	2	0	1	1	0	0	0	19
211030	2	0	0	1	1	0	1	1	1	3	6	0	1	1	0	0	0	34
211031	2	1	1	0	0	0	1	0	1	0	8	0		0	0	0	0	24
211032	2	0	0	1	1	0	1	0	1	2	14	1	1	1	0	1	0	23
211033	2	1	1	1	0	1	1	0	1	2	2	0	1	1	1	1	0	19
211034	2	1	0	1	0	0	1	0	1	3	4	0	1	1	1	1	0	23
211035	2	1	0	1	0	1	1	0	1	1	4	0	1	1	0	0	0	19
211036	2	0	1	0	1	1	1	0	0	0	0	0	1	1	0	1	0	27
211037	2	1	0	0	1	0	1	0	1	2	4	0	1	1	0	0	0	23
211038	2	0	0	1	1	0	1	1	1	2	2	0	1	1	1	1	0	34
211039	2	1	1	0	1	0	1	1	1	2	3	0	1	1	1	0	1	37
211040	2	0	0	1	1	0	1	0	0	0	0	0	1	1	0	1	0	28
211041	2	0	1	1	1	0	1	1	1	2	3	0	1	1	0	1	0	23
211042	2	0	0	1	1	0	1	0	1	1	2	0	1	1	1	1	0	32
211043	2	1	0	1	1	0	1	0	1	1	6	0	1	0	1	0	0	25
211044	2	0	1	0	1	0	1	1	1	2	8	0	1	1	0	0	0	19
211045	2	0	1	1	1	0	1	1	1	2	3	0	1	1	0	1	0	36
211046	2	1	1	1	1	0	1	0	1	3	0	0	1	1	0	0	0	21
211047	2	0	0	0	1	0	1	1						0	0	0	0	25
211048	2	0	0	0	1	0	1	0	1	2	5	0	1	1	0	1	0	26
211049	2	0	0	0	0	0	1	1	1	2	0	0	1	1	1	1	0	19
211050	2	0	0	0	1	0	1	0	1	1	0	0	1	1	0	0	0	35
211051	2	1	0	0	1	0	1	1	1	2	4	0	1	1	0	1	0	31
211052	2	0	0	0	1	0	1	1						0	0	1	0	31
211053	2	0	1	0	1	0	1	0	1	2	1	0	1	1	0	1	0	31
211054	2	0	0	1	0	0	1	0	1	2	0	0	1	1	0	1	0	24
211055	2	0	1	0	0	0	1	0	1	1	6	0	1	1	0	0	0	19
211056	2	1	0	1	1	0	1	0	1	2	14	1	1	1	1	1	0	23
211057	2	1	0	0	1	0	1	0	1	1	0	0	1	1	0	0	0	19
211058	2	0	1	0	1	0		0	1	2	12	0	0.833333	0	0	1	0	40
211059	2	0	0	0	1	0	1	0	1	1	0	0	1	1	0	0	0	20
211060	2	1	1	0	1	0	1	0	1	2	0	0	1	1	0	1	0	37
211061	2	1	0	1	0	0	1	0	1	1			1	1	0	0	0	19
211062	2	1	0	1	1	0	1	0	0	0	6	0	1	1	0	1	0	26
211063	2	1	0	0	1	0	1	0						0	0	1	0	26
211064	2	0	0	1	1	0	1	0	1	3	5	0	1	1	0	1	0	39
211065	2	0	1	0	1	0	1	0	1	2	8	0	1	1	1	0	0	25
211066	2	1	0	0	0	0	1	0	1	1	0	0	1	1	0	1	0	24
211067	2	0	0	0	1	0	1	0	1	3	0	0	1	1	0	1	0	35
211068	2	0	0	0	1	0	1	0	1	2	0	0	1	1	0	1	0	22
211069	2	1	0	1	1	0	1	0	1	2	0	0	1	1	0	1	0	29
211070	2	1	0	1	1	0	1	0	1	1	11	0	0.992908	0	1	1	0	34
211071	2	1	1	1	1	0	1	0	1	2	3	0	1	1	0	1	0	22
211072	2	0	0	0	1	0	1	0	1	1	6	0	1	1	0	1	0	25
211073	2	0	1	1	0	0	1	0	0	0	0	0	1	1	0	0	0	18
211074	2	0	0	0	0	1	1	0	1	2	0	0	0.993827	0	0	0	0	19
211075	2	0	0	1	0	0	1	1						0	0	1	0	31
211076	2	0	0	1	1	0	1	1	1	2	12	0	0.909091	0	1	0	0	34
211077	2	1	1	1	1	0	1	0	1	3	3	0	0.909091	0	1	1	0	21
211078	2	0	1	0	1	0	1	0	0	0	0	0	1	1	0	0	0	20
211079	2	0	0	0	1	0	1	0						0	0	1	1	25
211080	2	0	0	0	1	0	1	0	1	1			1	1	0	1	0	32
211081	2	0	0	0	1	0	1	1						0	1	1	1	38
211082	2	0	1	0	1	0	1	1	0	0	2	0	0.8	0	1	1	0	29
211083	2	0	0	0	1	0	1	0						0	0	1	0	38
211084	2	1	1	0	1	0	1	0	0	0	5	0	1	1	0	1	0	25
211085	2	0	0	0	0	0	1	1	1	2	3	0	1	1	0	1	0	18
211086	2	0	1	0	1	0	1	1	1	3	0	0	1	1	0	0	0	24
211087	2	1	0	1	1	0	1	0	1	2	8	0	1	1	1	1	0	26
211088	2	0	0	1	1	0	1	0	1	1	9	0	1	1	1	1	0	25
211089	2	0	0	0	1	0	1	1	0	0	0	0	1	1	0	1	0	29
211090	2	1	0	0	1	0	1	0	1	1	7	0	1	1	0	1	0	27
211091	2	1	0	0	1	0	1	0	1	2	0	0	1	1	0	1	0	36
211092	2	1	1	0	0	0	1	0	1	1	2	0	1	1	0	1	0	18
211093	2	0	0	0	1	0	1	0	0	0	0	0	1	1	0	1	0	23
211096	2	1	1	0	1	1	1	0	1	1	3	0	1	1	0	1	0	20
211097	2	1	1	0	1	0	1	0	0	0	1	0	1	1	1	0	0	26
301001	3	1	0	0	1	0	0	0	1	1	6	0	1	1	0	0	0	27
301002	3	1	1	0	0	1	1	0	1	1	7	0	1	1	0	0	0	20
301003	3	1	0	0	0	1	0	0	0	0	17	1	0.992908	0	0	1	1	21
301004	3	0	0	1	1	1	0	0	1	3	11	0	0.984375	0	1	0	1	22
301005	3	1	1	0	0	1	1	0	1	2	14	1	0.777778	0	0	0	1	18
301006	3	1	1	1	1	0	1	0	1	1	11	0	1	1	1	1	0	33
301007	3	1	0	0	1	0	1	0	1	1	14	1	0.976744	0	0	1	0
301008	3	0	0	0	1	0	0	0	1	2	10	0	1	1	0	1	0	21
301009	3	1	0	1	0	0	1	0	1	2	15	1	1	1	0	0	1	19
301010	3	0	1	1	0	1	1	0	1	1	9	0	0.969231	0	0	0	0	25
301011	3	0	0	0	1	1	1	0						0	0	1		20
301012	3	1	0	0	1	0	1	0	1	3	12	0	1	1	0	0	0	23
301013	3	1	0	1	1	0	0	0	0	0	10	0	1	1	0	1	0	21
301014	3	0	0	1	1	0	1	1	1	2			1	1	0	1	0
301015	3	0	0	0	1	0	1	0	1	4	2	0	1	1	1	0	1
301016	3	1	1	1	1	0	0	0	1	3			1	0	0	0	0	23
301017	3	1	0	1	1	0	1	0	1	4	11	0	1	1	0	0	0	26
301018	3	0	0	1	0	0	0	0	1	3	3	0	1	1	0	0	1
301019	3	1	1	1	0	1	1	0	1	3	9	0	0.988235	0	0	1	1	21
301020	3	1	0	1	0	0		0	1	3	14	1	0.99115	0	0	1	0	29
301021	3	0	0	1	1	0	0	0	1	4	1	0	1	1	1	1	1	31
301022	3	1	1	0	1	0	1	0	1	3	11	0	1	0	1	0	0	23
301023	3	1	0	0	1	0	0	0						0	1	1	0	24
301024	3	1	0	1	1	1	0	0	1	2	6	0	0.8	0	1	1	0	37
301025	3	0	1	0	1	1	0	0	1	2	10	0	1	1	0	1	0	23
301026	3	1	0	1	1	0	0	0	1	2	3	0	1	1	0	1	0	37
301027	3	0	1	1	0	0	0	0	1	3	6	0	1	1	0	0	0	20
301028	3	1	0	0	1	0	0	0	0	0	5	0	1	1	1	0	0	26
301029	3	1	0	1	1	0	0	0	1	1	7	0	0.897436	0	1	1	1	29
301030	3	1	0	1	0	1	1	0	1	1	6	0	1	1	1	1	0	22
301031	3	1	0	0	1	0	0	0	1	3	6	0	1	1	1	1	0	27
301032	3	1	0	1	0	0	0	0	1	4	7	0	1	1	0	0	1	20
301033	3	0	1	1	1	0	1	0	1	2	12	0	1	1	1	0	1	33
301034	3	1	0	1	1	0	0	0	1	4			1	1	0	0	1	20
301035	3	0	0	0	1	0	0	0	1	3	7	0	1	1	1	0	0	32
301036	3	1	0	0	1	0	0	0	1	3	2	0	1	1	0	1	0	33
301037	3	1	0	0	1	0	0	1	1	3	6	0	1	1	0	0	1	37
301038	3	1	0	1	1	0	0	0	1	2	9	0	1	1	1	0	0	26
301039	3	0	0	1	1	0	0	0	1	3			1	1	1	0	1	33
301040	3	0	0	0	0	0	0	0	0	0	11	0	1	1	0	1	0	25
301041	3	1	0	1	0	0	1	0	1	2	7	0	0.857143	0	0	1	0	21
301042	3	0	0	0	1	0	0	0	1	2	1	0	1	1	0	0	0	23
301043	3	0	0	1	1	0	1	0	0	0	4	0	1	1	0	0	1	36
301044	3	1	1	1	1	1	0	0	1	1	8	0	0.984375	0	0	1	0	24
301045	3	1	1	1	1	0	0	0	0	0	4	0	1	1	0	0	0	34
301046	3	1	1	0	0	1	0	0	1	2	3	0	1	1	1	0	0	18
301047	3	0	0	0	1	0	0	0	0	0	0	0	0.923077	0	1	1	0	30
301048	3	0	0	1	1	0	0	0	1	3	6	0	1	1	1	1	1	32
301049	3	0	1	1	1	1	0	0	0	0	9	0	1	1	0	0	0	21
301050	3	0	1	1	1	0	0	0	1	1	7	0	0.666667	0	0	1	0	18
301051	3	1	1	0	1	1	0	0	1	1	11	0	1	1	0	0	1	21
301052	3	1	0	0	1	1	0	0	1	2	4	0	0.782609	0	1	0	1	27
301053	3	1	0	1	1	0	1	0	1	1	9	0	0.705882	0	1	0	0	32
301054	3	0	0	1	0	0	0	0	1	2	8	0	1	1	0	1	0	19
301055	3	1	0	0	0	1	1	0	1	2	2	0	1	1	1	0	1	22
301056	3	1	0	0	0	0	0	0	1	1	5	0	0.888889	0	0	0	0	18
301057	3	1	0	1	1	0	0	0	1	1	4	0	0.875	0	0	1	0	27
301058	3	1	1	1	1	0		0	1	2	10	0	0.952381	0	0	0	1	31
301059	3	1	1	0	0	0	0	0	1	2	7	0	1	1	0	1	0	21
301060	3	1	0	0	1	1	0	0	1	1			0.75	0	0	1	1	28
301061	3	1	1	0	1	0	0	0	1	1	3	0	1	1	0	1	1	21
301062	3	1	0	1	1	0	1	0	1	2	14	1	1	1	0	1	0	20
301063	3	1	1	1	0	0		0	1	1	3	0	1	1	0	1	0	25
301064	3	1	1	1	1	0	1	0	1	1			1	1	0	1	0	28
301065	3	0	0	0	0	1	1	0	1	3	9	0	0.941176	0	1	0	1	20
301066	3	0	0	0	1	0	0	0	1	1	7	0	1	1	0	0	0	22
301067	3	1	1	1	1	0	1	0	1	1	21	1	1	1	0	1	1	30
301068	3	1	1	0	1	0	0	0	1	2	3	0	1	1	1	0	0	30
301069	3	0	0	0	0	1	0	0	1	2	2	0	1	1	0	0	0	20
301070	3	0	0	0	1	0	1	0	1	1	3	0	1	1	0	1	0	35
301071	3	0	1	1	1	0	1	1	1	4	7	0	1	0	0	0	1	25
301072	3	1	1	0	0	1	1	0	1	2	5	0	0.888889	0	0	1	0	22
301073	3	1	0	0	1	0	1	0	1	2	3	0	1	1	0	1	0	38
301074	3	1	0	0	1	1	1	0	1	2	1	0	1	1	0	0	0	21
301075	3	0	1	0	1	0	0	0	1	2	7	0	0.857143	0	1	0	0	31
301076	3	1	0	1	0	1	0	0	1	2	3	0	1	1	0	0	0	19
301077	3	0	0	1	1	0	1	0	1	1	18	1	1	1	1	0	1	25
301078	3	1	0	0	0	0	1	0	1	1	2	0	0.357143	0	0	1	0	30
301079	3	1	0	0	1	0	0	0	1	2	5	0	1	1	1	1	1	21
301080	3	1	0	0	0	1	1	0	1	3	6	0	1	1	0	0	0	20
301081	3	1	0	1	1	0	1	0	1	1	3	0	0.857143	0	0	1	0	19
301082	3	1	0	1	1	0	1	0	0	0	5	0	1	1	0	1	0	28
301083	3	0	1	0	1	0	1	0	1	3	5	0	0.833333	0	0	1	0	34
301084	3	1	1	0	1	0	1	0	0	0	8	0	0.976744	0	0	1	0	25
301085	3	1	0	1	1	0	1	0	1	2	8	0	1	1	0	1	0	26
301086	3	1	1	1	1	1	1	0	1	2	9	0	1	0	0	0	0	20
301087	3	1	0	0	1	0	0	0	1	1			1	1	0	0	0	24
301088	3	1	1	0	1	0	0	1	1	2	4	0	1	1	0	1	0	38
301089	3	1	0	1	1	0	0	0						0	0	0	0	30
301090	3	1	0	1	1	0	0	0	0	0	6	0	1	1	1	1	0	38
301091	3	1	0	0	1	0	0	0	1	2	13	1	0.8	0	0	0	0	26
301092	3	1	1	1	0	0	1	0	1	4	2	0	0.631579	0	0	0	1	20
301093	3	0	1	0	0	1	1	1	1	3	8	0	0.894737	0	0	0	1	26
301094	3	0	1	0	1	0	0	0	1	1			0.976744	0	1	0	0	24
301095	3	1	1	1	1	0	1	0	1	3	5	0	1	1	0	0	0	34
301096	3	0	0	1	0	0	1	0	0	0	8	0	1	1	0	1	0	21
301097	3	1	0	1	1	0	0	0	1	3	1	0	1	1	0	1	1	23
303001	3	0	0	1	1	0	0	0	1	3	4	0	1	1	0	0	1	32
303002	3	0	0	1	0	1	0	0						0	0	0	1	19
303003	3	1	0	0	1	0	1	0						0	0	1	0	31
303004	3	1	0	1	0	0	0	0	1	1	9	0	1	1	1	1	1	21
303005	3	1	0	1	1	0	1	0	1	3	0	0	1	1	1	1	0	28
303006	3	1	0	0	1	0	1	0						0	1	0	0	26
303007	3	1	0	1	0	1	1	0	1	3			1	1	0	1	0	19
303008	3	1	0	1	1	0	0	0	0	0	6	0	1	1	1	1	0	31
303009	3	1	0	0	1	0	1	0	0	0	0	0	1	1	0	0	0	29
303010	3	1	0	0	1	0	1	0	1	2	5	0	0.882353	0	0	1	0	27
406001	1	1	1	1	1	0	0	0						0	1	0	0	27
406002	1	0	0	0	1	0	1	0	0	0	1	0	1	1	1	0	0	40
406003	1	1	0	1	1	1	1	0	0	0			1	1	0	0	1
406004	1	0	0	1	1	0	0	0	0	0	8	0	0.952381	0	1	1	0	34
406005	1	1	0	1	1	0	1	0	0	0	7	0	0.823529	0	0	1	0	34
406006	1	1	1	0	1	0	1	0	0	0	1	0	0.923077	0	0	0	0	25
406007	1	1	0	1	1	0	0	0						0	0	0	0	27
406008	1	1	0	1	1	0	1	0	0	0	6	0	0.941176	0	0	0	0	28
406009	1	1	0	1	1	0	0	0	0	0	0	0	0.833333	0	0	0	0	22
406010	1	1	0	1	1	0	1	0	0	0	6	0	0.982456	0	0	0	0	24
406011	1	0	1	1	0	0	1	0	0	0	0	0	0.96	0	0	0	0	21
406012	1	0	1	1	0	0	1	0	0	0	0	0	0.888889	0	1	1	0	28
406013	1	0	0	1	0	0	1	0	0	0	3	0	1	1	0	1	0	21
406014	1	0	0	1	1	0	1	0	0	0	0	0	1	1	0	0	1	26
406015	1	0	0	1	0	0	1	0	0	0	11	0	0.96	0	1	0	0	25
406016	1	0	0	1	1	0	1	0	0	0	4	0	1	1	1	0	0	34
406017	1	1	0	1	1	0	0	0	0	0	16	1	0.888889	0	0	1	0	21
406018	1	0	0	1	0	0	1	0	0	0	6	0	1	1	0	1	0	24
406019	1	1	0	1	1	0	0	0	0	0	5	0	1	1	0	1	0	29
406020	1	1	0	1	1	0	0	0	0	0	6	0	1	1	0	0	1	22
406021	1	0	1	1	0	0	1	0	0	0	1	0	0.909091	0	0	0	0	19
406022	1	0	0	1	0	0	1	0	1	1	1	0	0.863636	0	0	1	1	27
406023	1	0	0	1	1	0	0	0	0	0	3	0	0.96	0	0	0	1	27
406024	1	0	0	1	0	0	0	0	0	0	0	0	0.992908	0	0	0	0	22
406025	1	0	1	1	1	0	0	0	0	0	0	0	1	1	0	0	0	25
406026	1	1	0	1	0	0	1	0	0	0	0	0	1	1	0	1	0	24
406027	1	0	0	0	0	1	0	0						0	0	0	0	20
406028	1	1	0	0	1	0	1	0						0	0	0	1	24
406029	1	0	0	1	1	0	0	0	0	0	5	0	1	1	0	0	0	39
406030	1	0	0	1	0	1	1	0	0	0	0	0	1	1	1	0	0	25
406031	1	1	0	0	0	0	1	0	0	0	0	0	1	1	0	0	0	33
406032	1	0	1	0	1	0	0	0	1	1	20	1	1	1	0	0	1	33
406033	1	1	1	1	1	0	1	0	0	0	11	0	1	1	0	0	0	38
406034	1	0	1	0	1	1	1	0	0	0	21	1	1	1	0	0	1	22
406035	1	0	0	1	1	0	1	0	0	0	0	0	1	1	0	0	0	26
406036	1	1	1	1	1	1	0	0						0	0	1	0	20
406037	1	0	1	1	1	1	1	0	0	0	1	0	0.857143	0	0	0	0	31
406038	1	0	0	1	1	0	1	0	0	0	0	0	1	1	0	1	0	32
406039	1	0	0	1	1	0	0	0	0	0	7	0	1	1	0	1	0	29
406040	1	0	0	0	0	1	1	0	0	0	2	0	1	1	0	0	0	22
406041	1	0	1	1	0	1	1	0						0	0	0	0	21
406042	1	0	0	1	1	0	1	0	0	0	0	0	1	1	0	1	0	32
406043	1	0	0	0	0	1	0	0	0	0	4	0	1	0	0	0	0	24
406044	1	1	0	1	1	0	0	0	0	0	0	0	1	1	0	0	0	22
406045	1	0	1	1	1	0	0	0	0	0	0	0	1	1	0	0	0	31
406046	1	0	0	1	1	0	0	0	0	0	10	0	1	1	1	0	1	33
406047	1	0	1	1	1	0	1	0	0	0	1	0	1	1	0	0	0	37
406048	1	0	0	1	1	0	1	0	0	0	0	0	0.888889	0	0	0	0	28
406049	1	0	0	1	0	0	0	0	1	0	1	0	0	0	0	1	0	31
406050	1	0	0	1	0	0	1	0						0	0	0	1	21
406051	1	0	0	1	0	1	0	0	0	0	14	1	0.923077	0	1	0	0	22
406052	1	0	0	1	0	0	0	0						0	1	1	0	22
406053	1	0	1	0	1	0	1	0	0	0	0	0	1	1	1	0	0	32
406054	1	1	1	1	1	0	1	0	0	0			1	1	0	1	0	25
406055	1	0	0	1	0	0	1	0	0	0	9	0	1	1	1	0	0	24
406056	1	0	0	1	1	0	1	0	0	0	0	0	0.827586	0	0	0	1	29
406057	1	0	1	1	0	0	0	0	0	0	29	1	1	1	1	0	1	27
406058	1	1	1	1	1	0	1	0	0	0	6	0	0.625	0	0	0	1	31
406059	1	1	0	1	1	0	0	0	0	0	0	0	0.652174	0	1	1	0	35
406060	1	0	0	1	0	1	0	0	0	0			0.608696	0	0	0	0	19
406061	1	0	0	1	1	1	0	0	0	0	0	0	0.888889	0	0	0	0	30
406062	1	0	0	1	0	0	1	0						0	0	1	0	24
406063	1	1	0	1	1	0	1	0	0	0	4	0	1	1	0	0	0	24
406064	1	0	0	1	0	0	1	0	0	0	7	0	1	1	1	1	0	28
406065	1	0	1	1	1	0	0	0						0	0	1	0	31
406066	1	1	1	1	0	0	0	0	0	0	0	0	0.923077	0	0	1	0	31
406067	1	1	0	1	0	1	0	0	0	0	7	0	0.769231	0	1	0	0	24
406068	1	1	1	1	0	0	1	0	0	0	0	0	0.941176	0	1	1	0	30
406069	1	0	0	1	0	1	1	0	0	0	3	0	0.8	0	0	0	0	27
406070	1	1	0	1	0	0	0	0	0	0	0	0	1	0	0	0	0	19
406071	1	1	0	1	1	1	0	0						0	1	0	0
406072	1	1	0	1	0	0	0	0	0	0			0.982456	0	0	0	0	28
406073	1	1	0	1	0	0	1	0	0	0	0	0	0.923077	0	1		0	29
406074	1	0	0	0	1	0	1	0	0	0	0	0	0.774194	0	1	0	1	28
406075	1	1	0	1	1	0	0	0	0	0	3	0	0.8	0	1	1	0	33
406076	1	1	1	1	1	0	1	0	0	0	0	0	1	1	0	0	1	30
406077	1	1	0	0	1	0	1	0	0	0	0	0	0.8	0	0	0	1	35
406078	1	0	0	1	1	0	0	0	0	0	25	1	0.965517	0	1	1	0	29
406079	1	1	1	1	1	0	1	0	0	0	0	0	0.888889	0	0	1	0	33
406080	1	1	0	1	1	0	0	1	0	0	0	0	1	1	0	0	0	28
406081	1	1	0	1	0	0	0	0	1	1	0	0	0.952381	0	1	1	0	28
406082	1	0	0	1	0	0	1	0	0	0	0	0	1	1	0	1	0	25
406083	1	1	1	1	1	0	1	0						0	1	1	1	32
406084	1	1	0	0	1	0	0	0	0	0	8	0	1	1	1	1	0	28
406085	1	0	0	1	0	0	0	0						0	0	1	0	30
406086	1	1	1	1	0	0	1	1	0	0	0	0	0.909091	0	0	0	0	24
406087	1	0	0	1	1	0	1	0						0	1	1	0	28
406088	1	1	0	1	1	0	0	0	0	0	0	0	0.869565	0	0	0	1	40
406089	1	1	0	1	1	0	1	0	0	0	1	0	1	1	0	0	0	23
406090	1	1	0	1	1	0	1	0	0	0	11	0	1	1	0	1	0	27
406091	1	0	0	1	1	0	1	0	0	0	0	0	1	1	0	1	0	37
406092	1	1	1	0	1	0	1	0	0	0	0	0	0.8	0	0	1	0	31
406093	1	0	1	1	0	0	0	0	0	0			0.982456	0	1	1	1	29
406094	1	1	0	1	0	0	0	0	0	0	10	0	0.888889	0	0	1	0	29
406095	1	1	0	1	1	0	1	0	0	0	0	0	1	1	1	0	0	26
406096	1	0	1	1	0	0	0	0	0	0	7	0	1	1	1	0	1	20
406097	1	1	0	1	1	0	1	0	0	0	0	0	0.870466	0	0	0	0	30
406098	1	1	0	1	0	0	0	0	0	0	11	0	1	1	1	1	0	27
406099	1	0	0	1	1	0	0	0	0	0	7	0	0.842105	0	0	0	0	30
406100	1	1	0	1	0	0	1	0	0	0	0	0	0.914286	0	1	0	0	26
406101	1	1	1	1	0	0	0	0	1	0	0	0	0.940299	0	1	0	0	20
406102	1	1	0	1	1	0	0	0	0	0	0	0	0.918033	0	0	1	0	33
406103	1	0	1	1	1	0	1	0	0	0			0.888889	0	0	0	0	37
406104	1	1	1	1	1	0	0	0	0	0	0	0	0.88	0	1	0	0	24
412001	1	1	0	1	1	0	0	0	0	0	5	0	1	1	1	1	0	33
412002	1	1	0	1	1	0	0	0	0	0	2	0	1	1	1	0	1	29
412003	1	0	0	1	1	0	0	0	0	0	4	0	1	1	0	1	0	34
412004	1	1	0	1	1	0	0	0	0	0	0	0	1	0	0	0	0	39
412005	1	1	0	1	1	0	0	0	0	0	7	0	0.933333	0	1	0	1	29
502001	3	0	0	1	1	0	0	0	1	3	0	0	1	1	1	1	0	22
502002	3	0	0	0	1	0	0	0	1	2	0	0	1	1	0	1	0	23
502003	3	1	1	0	0	0	0	0						0	0	0	0	23
502004	3	0	1	1	1	0	0	1						0	0	0	0	37
502005	3	0	1	0	1	0	0	0	1	2	0	0	1	1	0	0	0	29
502006	3	0	0	1	1	0	0	0	1	3	1	0	0.909091	0	0	1	0	24
502007	3	1	0	0	0	0	0	0						0	0	0	0	22
502008	3	0	1	1	0	1	1	0	1	2	0	0	1	1	0	0	1	18
502009	3	1	0	0	1	0	1	0	1	4	2	0	1	1	1	1	0	30
502010	3	0	1	1	1	0	0	0	1	5	2	0	1	1	1	1	1	24
502011	3	1	1	1	0	1	0	1	1	2	2	0	1	1	0	0	1	20
502012	3	0	1	1	0	0	1	0	0	0	4	0	1	1	0	0	0	19
502013	3	0	1	0	1	0	0	0	1	3	8	0	1	1	1	0	0	37
502014	3	0	1	1	1	0	0	0	1	7	0	0	1	1	0	0	0	29
502015	3	0	1	1	1	0	0	1	1	4	0	0	1	1	1	0	1	32
502016	3	1	0	0	1	0	0	0	1	3	6	0	1	1	0	0	0	24
502017	3	1	0	1	0	0	0	0	1	4	0	0	0.97541	0	1	1	0	25
502018	3	0	0	0	1	0	1	0						0	1	0	0	35
502019	3	0	0	0	1	0	0	0						0	1	0	1	23
502020	3	0	1	1	1	0	1	0	0	0	11	0	1	1	1	1	0	33
502021	3	1	1	1	1	0	0	0	1	4	4	0	1	1	1	0	1	28
502022	3	1	1	1	0	0	1	0	1	3	3	0	0.714286	0	1	1	0	32
502023	3	1	0	0	1	0	1	0	1	2	12	0	1	1	1	0	1	28
502024	3	0	1	0	1	0	0	0	1	3	10	0	0.857143	0	0	0	1	27
502025	3	0	0	0	0	0	0	0						0	1	0	0	24
502026	3	0	0	0	1	0	1	0						0	1	0	0	31
502027	3	0	1	0	1	0	0	0						0	0	0	1	33
502028	3	1	1	1	1	0	0	1	1	3	0	0	1	1	0	0	0	38
502029	3	0	1	1	1	0	0	1						0	0	0	0	29
502030	3	1	0	0	1	0	1	1	0	0	0	0	0.833333	0	0	0	0	27
502031	3	1	1	0	0	1	0	0	1	3	10	0	0.714286	0	0	0	0	18
502032	3	0	1	0	1	0	1	0	1	2	11	0	1	1	1	1	1	26
502033	3	0	0	0	1	0	1	0	1	6	19	1	1	1	0	0	0	22
502034	3	0	1	0	1	0	0	0						0	1	0	1	23
502035	3	1	1	1	0	0	0	0	1	3	0	0	0.983471	0	0	0	0	26
502036	3	1	1	1	0	1	0	0	1	2	1	0	1	1	1	0	1	21
502037	3	0	0	0	1	0	0	1	1	2	0	0	1	1	0	0	1	35
502038	3	1	0	0	1	0	0	0						0	0	1	0	23
502039	3	0	1	0	1	0	1	0	1	3	10	0	1	1	0	0	1	29
502040	3	1	0	0	1	0	0	0	1	3	5	0	1	1	0	0	0	20
502041	3	0	0	1	0	0	1	0	1	3	1	0	1	1	0	0	0	25
502042	3	0	1	0	1	0	1	1	1	3	7	0	1	1	1	1	0	34
502043	3	1	0	0	1	0	1	0	1	2	3	0	1	1	1	1	1	24
502044	3	1	0	1	1	0	0	0	1	2	4	0	1	1	1	0	1	32
502045	3	0	0	0	1	0	0	0	1	3	3	0	1	1	1	1	0	31
502046	3	1	0	1	1	0	0	0	1	4	2	0	1	1	0	0	0	38
502047	3	0	0	0	1	0	0	0	1	2	10	0	1	1	1	0	1	28
502048	3	0	0	0	1	0	1	0	1	1	13	1	0.875	0	0	0	0	33
502049	3	0	0	0	1	0	0	1						0	0	1	0	20
502050	3	0	0	1	1	0	1	1	1	4	17	1	1	1	0	0	0	19
502051	3	1	0	1	1	0	0	0						0	0	0	0	28
502052	3	0	1	0	0	0	0	0	1	2	2	0	1	1	0	0	0	21
502053	3	0	1	0	1	0	0	0	1	1	13	1	0.789474	0	0	0	0	22
502054	3	1	1	1	1	0	1	1	1	4	0	0	1	1	1	0	0	26
502055	3	1	1	0	1	0	0	0	1	2	0	0	1	1	1	1	1	19
502056	3	0	0	0	0	0	1	0	1	2	3	0	0.833333	0	1	0	0	23
502057	3	1	1	0	0	0	0	0	1	3	9	0	1	0	0	0	1	18
502058	3	0	0	1	0	0	1	0	1	4	2	0	1	1	0	0	0	21
502059	3	1	1	1	1	0	0	0	1	3	10	0	1	1	1	0	0	27
502060	3	1	0	0	1	0	0	0	1	3	0	0	1	1	0	0	0	26
502061	3	0	1	0	0	1	1	0						0	0	1	0	20
502062	3	1	1	0	1	1	0	0	0	0	1	0	0.777778	0	0	0	1	28
502063	3	1	1	0	1	1	0		1	2	7	0	1	1	0	0	0	20
502064	3	0	1	0	1	0	0	1	1	3	0	0	1	1	0	0	1	40
502065	3	0	1	1	1	0	0	1	1	3	8	0	1	1	0	0	1	28
502066	3	0	1	0	1	0	0	0	1	2	3	0	0.7	0	0	0	1	22
502067	3	1	1	1	1	0	0	0	1	4	7	0	1	1	0	1	0	38
502068	3	0	1	0	1	0	0	0	1	3	14	1	1	1	0	0	0	22
502069	3	1	1	1	0	0	0	0	1	2	7	0	1	1	0	0	0	22
502070	3	0	0	0	1	0	0	0	1	3	0	0	1	1	0	0	0	31
502071	3	1	0	0	0	1	0	0	1	0	0	0	1	1	1	0	1	30
502072	3	1	1	0	1	0	0	0	1	3	17	1	1	1	1	1	0	37
502073	3	1	1	1	0	1	1	0	1	3	2	0	1	1	1	1	0	30
502074	3	0	0	0	1	0	0	0	1	4	0	0	0.75	0	0	0	0	37
502075	3	1	0	1	0	1	0	0	1	3	10	0	0.555556	0	0	0	0	18
502076	3	1	0	0	0	0	0	0	1	2	0	0	0.625	0	1	0	0	25
502077	3	1	1	0	1	1	1	1						0	1	0	0	29
502078	3	0	0	1	1	0	0	0	1	2	7	0	1	1	1	0	0	19
502079	3	1	0	1	1		0	0	1	2	0	0	0.666667	0	1	1	0	33
502080	3	1	0	0	1	0	0	0	1	3	0	0	1	1	1	0	1	20
502081	3	0	1	1	1	0	0	1	1	3	14	1	0.833333	0	0	0	1	19
502082	3	1	1	1	0	1	0	0	1	1	0	0	1	1	0	1	0	27
502083	3	0	1	1	1	0	0	0	1	2	3	0	0.777778	0	0	0	0	23
502084	3	1	1	0	0	0	0	0	1	4	0	0	0.727273	0	1	0	1	23
502085	3	0	0	0	0	0	0	0						0	1	1	0	27
502086	3	1	0	0	1	0	0	0	1	3	0	0	0.909091	0	1	0	1	26
502087	3	0	1	0	0	0	1	0	1	2	1	0	1	1	0	0	1	19
502088	3	0	1	0	1	0	0	0	1	2			0.888889	0	1	0	0	37
502089	3	0	0	0	1	0	0	0	1	2	0	0	0.857143	0	0	1	1	32
502090	3	0	1	1	1	0	0	0	1	2	19	1	1	1	0	1	0	23
502091	3	0	0	0	1	0	0	0	1	3			0.923077	0	0	0	0	23
502092	3	0	0	0	1	0	1	0	1	4	5	0	1	1	0	1	1	39
502093	3	1	1	0	1	0	0	0	1	3	0	0	1	1	0	0	0	46
502094	3	0	1	1	1	0	0	0	1	2	0	0	1	1	0	1	0	29
502095	3	1	0	0	1	0	1	0						0	0	0	0	36
502096	3	0	1	1	0	0	1	0	1	2	0	0	0.8125	0	1	0	1	23
502097	3	0	0	0	1	0	0	0	1	5	21	1	1	1	0	0	1	32
502098	3	1	0	1	1	0	1	0	1	5	4	0	1	1	0	1	0	33
502099	3	0	0	1	1	0	0	0	1	2	0	0	1	1	0	0	0	24
502100	3	1	0	1	1	0	0	0	1	3	0	0	0.764706	0	0	1	0	35
509001	3	0	1	0	1	1	1	0	1	1	6	0	1	1	0	0	0	29
509002	3	1	1	0	1	0	1	0	1	3	11	0	1	1	0	0	0	34
509003	3	0	1	0	1	0	0	0	0	0	6	0	1	1	0	0	0	41
509004	3	1	0	0	1	0	1	0	1	2	4	0	1	1	1	0	0	40
509005	3	1	0	0	1	0	1	0	1	3	4	0	1	1	1	0	1	28
509006	3	1	1	0	1	0	1	1	1	3	1	0	1	1	0	0	1	27
509007	3	0	1	1	0	1	0	0	1	2	0	0	1	1	0	0	0	19
509008	3	1	0	0	1	0	0	0	1	3	1	0	1	1	1	0	1	31
509009	3	0	0	0	1	0	0	0	1	2			1	1	1	0	0	24
509010	3	0	1	0	1	0	1	0	1	1	3	0	1	1	1	0	1	26
509011	3	0	1	0	1	0	1	0	1	1	5	0	1	1	0	0	0	28
509012	3	0	0	0	1	0	1	0	1	3	6	0	1	1	0	0	0	40
509013	3	1	1	0	0	0	0	0	1	2	3	0	1	1	0	0	0	18
509014	3	0	0	0	1	0	0	0	0	0	5	0	1	1	0	0	0	24
509015	3	1	0	0	1	0	0	0	1	3	2	0	0.866667	0	0	1	1	31
509016	3	1	0	0	1	0	0	0	1	3			1	1	0	0	0	34
509017	3	0	1	0	1	0	1	0						0	0	0	0	38
509018	3	1	1	0	1	0	1	0	1	2	7	0	1	1	0	0	0	28
509019	3	1	0	1	0	1	1	0	1	1	1	0	0.785714	0	0	0	0	18
509020	3	0	0	0	1	0	0	0						0	0	0	0	28
509021	3	1	1	0	0	1	0	0	1	4	4	0	1	1	0	0	0	23
509022	3	0	0	0	1	0	1	1	1	1	13	1	0.571429	0	1	0	0	36
509023	3	0	1	0	1	0	1	1	1	1	3	0	1	1	0	1	0	37
509024	3	0	0	0	1	0	0	0	1	2	9	0	0.888889	0	1	0	1	34
509025	3	1	0	1	0	1	0	0	1	4	7	0	1	1	1	0	0	20
509026	3	1	0	0	0	0	0	0						0	0	1	1	24
509027	3	1	0	0	1	0	0	0	1	3			0.909091	0	0	0	0	19
509028	3	0	1	0	1	0	0	0						0	0	0	1	41
509029	3	1	0	1	0	0	0	0	1	2	1	0	1	1	1	1	0	28
509030	3	0	1	1	0	0	0	0	1	3	3	0	0.666667	0	0	1	0	19
509031	3	0	1	0	1	0	0	0	0	0	1	0	1	1	0	0	0	35
509032	3	0	1	0	1	0	0	1						0	1	0	0	31
509033	3	1	1	0	1	1	1	0	1	3	0	0	0.875	0	0	1	1	21
509034	3	0	1	0	1	0	1	1	1	1	0	0	1	1	0	0	0	26
509035	3	0	1	1	1	0	0	0						0	0	1	0	31
509036	3	0	1	0	1	0	0	0	1	4	8	0	0.9	0	1	0	0	35
509037	3	0	0	0	0	0	1	0						0	0	0	0	19
509038	3	1	0	1	1	0	1	0	1	1	0	0	0.8125	0	0	1	0	19
509039	3	1	1	1	1	0	1	0	1	3	0	0	1	1	0	0	0	31
509040	3	0	0	1	1	0		0	1	2			0.692308	0	0	0	0	25
509041	3	1	1	1	1	0	1	0	1	3	0	0	0.952381	0	0	0	1	19
509042	3	0	1	1	0	0	1	0						0	0	1	0	26
509043	3	0	1	1	1	0	0	1	1	2	8	0	1	1	1	0	1	23
509044	3	0	0	0	1	0	0	0	1	5	16	1	1	1	1	0	1	28
509045	3	1	0	1	1	0	1	0	1	2	9	0	0.928571	0	1	0	0	33
509046	3	0	0	0	1	0	0	0	1	3	2	0	1	1	0	0	1	29
509047	3	0	0	0	1	0	0	1	1	1	2	0	0.909091	0	1	0	0	32
509048	3	0	0	1	1	0	1	0	1	2	2	0	0.785714	0	0	0	0	28
509049	3	1	0	0	1	0	0	0	1	2	1	0	1	1	0	0	0	25
509050	3	0	0	1	1	0	1	0						0	0	1	0	23
509051	3	0	1	0	1	0	1	0	1	4	5	0	1	1	0	0	0	36
509052	3	1	1	0	0	1	1	0	0	0	7	0	1	1	0	0	0	18
509053	3	0	1	0	1	0	0	0	1	4	0	0	1	1	0	0	0	26
509054	3	0	1	1	1	0	0	0	1	3	2	0	1	1	0	0	0	22
509055	3	0	0	0	0	0	1	0	1	4	8	0	0.9375	0	0	1	0	20
509056	3	1	1	1	0	1	1	1	1	2	0	0	0.875	0	0	0	1	19
509057	3	0	0	0	1	0	1	0	1	4	0	0	0.571429	0	0	1	0	31
509058	3	1	1	0	1	0	0	0	1	4	1	0	1	1	1	0	0	38
509059	3	1	1	1	1	0	0		1	1	0	0	1	1	1	0	1	36
509060	3	0	0	0	1	0	0	0	1	1	6	0	1	1	1	0	0	31
509061	3	1	1	1	1	0	1	0	1	3	5	0	0.789474	0	0	0	0	26
509062	3	1	0	1	1	0	0	0	1	3	1	0	0.875	0	1	0	1	30
509063	3	1	1	0	1	0	0	1	1	4			0.882353	0	0	0	1	20
509064	3	1	0	1	0	0	1	0	1	1	2	0	1	0	0	1	0	21
509065	3	0	1	0	1	0	1	0						0	1	0	1	40
509066	3	1	1	0	0	0	0	0	1	2	2	0	0.736842	0	0	0	1	22
509067	3	0	0	0	1	0	0	0	0	0	0	0	1	1	0	0	0	27
509068	3	1	0	1	1	0	0	0	1	2	0	0	1	1	0	1	1	24
509069	3	0	1	1	1	0	0	0	1	2	1	0	1	1	0	1	1	28
509070	3	0	1	0	1	0	1	0	1	3	11	0	0.846154	0	1	0	1	28
509071	3	0	0	0	1	0	1	0	1	2	0	0	0.588235	0	0	0	1	23
509072	3	1	1	0	1	0	0	1	1	2	3	0	0.833333	0	0	0	0	42
509073	3	0	1	0	1	0	0	0	1	4			1	1	0	0	0	21
509074	3	0	0	0	1	0	0		1	3	0	0	1	1	1	0	0	28
509075	3	0	0	0	1	0	0	0	1	2	1	0	1	1	0	1	1	28
509076	3	0	0	0	1	0	0	0	1	3	2	0	1	1	1	1	0	38
509077	3	0	1	0	1	0	0	0	1	1	0	0	1	1	1	0	0	25
509078	3	0	1	0	1	0	0	0	1	2	0	0	1	1	0	0	0	35
509079	3	0	1	0	1	0	0	0	1	3	0	0	1	1	1	0	1	30
509080	3	0	0	0	1	0	0	0	1	1	1	0	0.823529	0	1	1	1	26
509081	3	0	0	0	1	0	1	1	0	0	0	0	0.785714	0	0	0	1	35
509082	3	1	1	1	0	1	0	0	1	4	0	0	1	1	0	1	0	21
509083	3	0	1	1	1	0	0	1	1	1	0	0	0.8	0	0	0	0	31
509084	3	0	0	0	1	0	0	1	1	2	0	0	1	1	1	0	0	26
509085	3	0	0	0	1	0	0	0	1	2	0	0	1	1	0	0	0	24
509086	3	1	0	0	1	0		0	1	3	0	0	1	1	0	1	0	23
509087	3	0	1	0	1	0	0	0	1	1	1	0	0.8	0	0	0	0	32
509088	3	0	1	0	1	0	0	0	1	1	0	0	0.764706	0	0	0	0	25
509089	3	0	1	0	1	0	0	0	1	3	0	0	1	1	0	0	0	27
509090	3	1	0	1	0	0	1	0	1	2	0	0	1	1	0	0	0	19
509091	3	1	0	1	1	0	0	0	1	3	0	0	1	1	0	0	0	27
509092	3	0	1	0	0	1	0	1	1	4	3	0	0.666667	0	0	0	0	20
509093	3	1	0	1	0	0	1	0	1	3	0	0	1	1	0	0	1	19
509094	3	1	1	1	0	0	1	0	1	1	0	0	1	0	0	0	0	19
509095	3	1	0	1	1	0	0	0	1	1	0	0	0.714286	0	0	0	1	24
509096	3	0	1	1	1	0	0	0	1	1	0	0	0.866667	0	0	0	1	40
509097	3	1	0	0	1	1	1	0						0	0	0	0	36
509098	3	0	0	0	1	0	0	0	1	1	4	0	1	1	0	0	0	36
509099	3	0	1	0	1	0	0	1	1	1	0	0	0.916667	0	0	0	1	47
509100	3	0	1	1	1	0	0	1	0	0	4	0	1	1	0	1	0	31
509101	3	1	1	0	0	1	1	0	1	2	0	0	1	1	1	1	1	21
603026	2	1	1	0	0	1	0	0	1	3	7	0	1	0	1	1	1	24
603027	2	1	1	0	0	1	1	0	1	2	4	0	1	0	0	1	0	19
603028	2	1	0	1	0	0	0	0	1	5	0	0	1	1	0	1	0	27
603029	2	0	0	0	1	0	1	0	1	3	9	0	1	1	0	1	0	19
603030	2	0	0	0	1	0	0	0	1	3	15	1	1	1	0	1	1	26
603031	2	1	0	1	0	1	1	0	1	4	14	1	1	0	1	1	0	19
603032	2	1	1	0	0	1	0	0						0	0	0	0	26
603033	2	0	0	0	1	0	1	0	1	2	9	0	1	0	0	1	0	19
603034	2	1	0	0	1	0	1	0	1	2	5	0	1	1	1	0	0	24
603035	2	0	1	0	1	0	0	0	1	3	6	0	1	1	0	1	1	31
603036	2	0	0	0	1	0	0	0	1	2	6	0	1	1	0	1	0	21
603037	2	0	1	0	1	1	0	0	1	3	8	0	1	0	1	1	0	29
603038	2	0	0	0	1	0	0	0	1	3	3	0	1	1	1	0	0	29
603039	2	1	0	1	0	0	1	0	1	3	4	0	1	0	0	1	0	25
603040	2	1	0	1	1	0	0	0	1	2	11	0	1	1	1	1	0	28
603041	2	0	0	1	1	0	0	0	1	4	3	0	1	1	1	1	0	32
603042	2	0	0	1	1	0	0	0						0	1	1	1	38
603043	2	1	1	0	0	1	0	0	1	5	4	0	1	1	0	0	0	19
603044	2	1	0	0	1	0	0	1						0	1	1	0	34
603045	2	1	0	1	1	0	0	0	1	2	4	0	1	0	0	1	0	27
603046	2	1	0	1	1	0	0	0						0	0	1	1	29
603047	2	1	0	0	1	0	0	0	1	4	1	0	1	1	1	0	0	35
603048	2	1	0	1	1	0	0	0	1	4	1	0	1	1	0	1	0	33
603049	2	1	0	1	1	0	0	0	1	3			1	1	0	1	0	25
603050	2	0	0	0	1	0	0	0	1	2	11	0	1	1	0	1	0	29
603051	2	1	1	0	1	0	0	0						0	0	1	0	33
603052	2	0	0	1	1	0	0	0	1	2	17	1	1	1	1	0	0	25
603053	2	1	1	0	1	0	0	0	1	4	16	1	1	0	0	0	0	27
603054	2	0	0	1	0	0	0		1	4	4	0	1	0	1	1	1	18
603055	2	1	0	1	0	0	0	0	1	4	3	0	1	1	1	1	0	22
603056	2	1	0	1	1	0	0	0	1	3	9	0	1	1	1	1	1	27
603057	2	1	0	1	0	0	0	0	1	3	10	0	0.8	0	1	1	0	25
603058	2	0	0	1	0	1	0	0						0	0	0	1	18
603059	2	0	0	0	1	0	0	0	1	3	9	0	1	1	0	1	0	30
603060	2	0	0	0	1	0	0	0	1	3	7	0		0	0	1	1	27
603061	2	1	0	0	0	0	0	0	1	4	14	1	0.952381	0	1	1	1	26
603062	2	1	0	1	1	0	0	0	1	6	10	0	1	0	0	1	0	25
603063	2	1	0	1	1	0	0	0	1	3	6	0	1	1	0	1	0	19
603064	2	1	0	0	1	0	0	1	1	3	6	0	1	1	0	0	0	20
603065	2	1	0	0	1	0	1	0	1	3	6	0	1	1	1	1	0	31
603066	2	1	0	1	1	0	0	0	1	2	13	1	1	1	0	0	0	30
603067	2	1	1	0	1	0	0	0	1	4			1	1	1	1	1	36
603068	2	0	0	0	1	0	0	0						0	1	1	1	29
603069	2	1	0	0	1	1	0	0	1	2	9	0	1	1	0	1	0	28
603070	2	0	0	1	1	0	0	0						0	0	1	0	18
603071	2	1	0	1	1	0	0	0	1	2	11	0	1	1	0	1	0	28
603072	2	1	1	1	1	0	0	0	1	2	11	0	1	0	1	1	1	32
603073	2	0	0	0	1	0	0	0	1	3	11	0	1	1	0	1	0	32
603074	2	1	0	1	1	0	0	0	1	2	17	1	1	1	0	1	0	37
603075	2	1	0	1	0	0	0	0	1	3	6	0	1	1	0	1	1	29
603076	2	1	1	1	1	0	0	0	1	3	9	0	1	1	1	1	0	40
603077	2	0	1	1	0	0	0	0						0	1	1	0	25
603078	2	1	0	0	1	0	0	0	1	3	5	0	1	1	0	1	0	19
603079	2	0	0	1	0	0	0	0	1	3	5	0	1	1	0	1	0	20
603080	2	1	0	1	1	0	0	0	1	3	9	0	1	1	0	1	0	30
603083	2	1	0	1	1	0	0	1	1	3	1	0	1	1	0	1	0	32
603086	2	0	0	1	1	0	0	0	1	3	5	0	1	1	0	1	0	28
603087	2	0	0	1	1	0	0	0	1	2	6	0	1	1	0	1	0	22
603088	2	1	0	0	1	0	0	0	1	2	9	0	1	1	1	1	0	23
603089	2	0	1	0	1	0	0	0	1	2	6	0	1	1	0	1	0	31
603090	2	1	0	1	0	0	0	0						0	0	1	0	22
603091	2	1	0	0	1	0	0	0	1	4	3	0	1	1	0	1	0	24
603092	2	0	0	0	1	0	0	0	1	2	6	0	1	1	1	0	0	23
603093	2	0	0	0	1	0	0	0	1	0	5	0	1	1	1	1	0	37
603096	2	1	0	0	1	0	0	0	1	2	4	0	1	1	0	1	0	32
603097	2	1	0	1	1	0	0	0	1	5	23	1	1	1	0	1	0	25
603098	2	0	1	0	1	1	0	0	1	2	10	0	1	1	0	1	0	24
603099	2	1	0	0	0	0	0	0	1	3			1	1	1	1	1	37
603100	2	1	1	1	1	0	0	0	1	3	3	0	1	1	0	1	0	24
603101	2	0	0	0	1	0	0	0						0	1	1	0	37
608001	2	1	1	0	1	0	1	1	1	3	7	0	1	1	1	0	1	24
608002	2	1	0	1	0	0	1	0	1	4	5	0	1	1	0	0	0	20
608003	2	1	0	1	0	0	1	0	1	2	4	0	1	1	0	0	0	20
608004	2	1	1	0	1	0	1	1	1	2	1	0	0.9375	0	1	0	0	35
608005	2	1	1	0	1	0	1	0	1	3	6	0	1	1	1	0	1	22
608006	2	1	0	1	1	0	1	1	1	4	1	0	1	1	0	1	0	35
608007	2	1	1	1	0	0	0	0	1	3	2	0	1	1	1	1	0	29
608008	2	1	0	1	0	0	0	0	1	4	2	0	1	1	0	0	0	19
608009	2	1	0	1	1	0	1	0	1	4	12	0	0.963303	0	1	0	0	24
608010	2	1	0	1	1	0	1	1						0	0	1	0	30
608011	2	0	0	0	0	1	1	0						0	0	0	1	19
608012	2	1	0	1	1	0	1	0	1	4	2	0	0.666667	0	0	0	0	35
608013	2	1	0	1	1	0	1	0	1	3	10	0	1	1	0	1	0	34
608014	2	1	1	0	1	0	0	0	1	3			0.952381	0	0	0	1	26
608016	2	0	0	1	1	0	1	0	1	3	6	0	1	0	0	0	1	25
608017	2	0	0	0	1	0	1	0						0	0	1	0	26
608018	2	1	1	0	1	0	1	0						0	0	1	0	36
610001	2	1	1	1	1	0	1	0	1	3	13	1	1	1	0	0	0	18
610002	2	1	1	1	0	0	1	1						0	0	0	0	23
610005	2	0	1	0	1	0	1	0						0	1	0	0	29
610006	2	1	1	1	1	0	1	0	1	4	4	0	1	1	0	1	0	27
610007	2	0	0	1	1	0	0	0						0	1	0	0	25
610008	2	0	1	0	1	0	1	0						0	0	0	0	25
610009	2	0	0	1	1	0	0	0	1	4	12	0	1	1	1	0	0	32
610010	2	0	0	1	1	0	1	0	1	3			1	1	1	1	0	29
610011	2	1	1	1	1	0	1	0	1	4	2	0	1	1	1	0	0	36
610012	2	0	0	0	1	0	1	0	1	4	7	0	1	1	1	0	0	30
610013	2	0	0	1	1	0	1	0	1	3	2	0	1	1	0	0	0	28
610014	2	0	0	1	0	0	1	0						0	1	1	0	21
610015	2	0	0	0	1	0	0	0	1	3	11	0	0.818182	0	0	0	1	30
610016	2	1	0	0	1	0	1	1	1	4			1	1	1	0	0	23
610017	2	1	0	0	1	0	1	1						0	0	0	0	22
610018	2	1	0	1	1	0	1	0	1	3	6	0	1	1	1	0	1	27
610019	2	0	1	1	0	1	0	0	1	5			0.769231	0	0	0	0	19
610020	2	1	0	1	1	0	1	0	1	2	7	0	1	0	1	0	0	39
610021	2	0	0	0	1	0	1	0	1	4	0	0	1	1	0	0	0	29
610022	2	1	1	0	1	0	1	0						0	0	1	0	39
610023	2	1	0	1	1	0		0	1	2	0	0	1	1	0	1	1	22
610024	2	1	0	0	0	0	1	1	1	4	4	0	1	0	0	0	0	23
610025	2	0	0	1	1	0	1	0	1	3			1	1	1	1	0	25
610026	2	0	0	0	0	0	1	0	1	4	5	0	1	1	0	0	0	23
612019	2	1	1	1	1	0	1	0	1	3	1	0	1	1	0	1	0	30
612020	2	1	0	1	1	0	1	0	1	3	24	1	1	1	0	1	1	32
612021	2	1	0	1	1	0	0	0	1	2	3	0	1	0	1	1	0	37
612022	2	1	1	1	0	0	1	0	1	5	10	0	1	1	0	0	0	18
612023	2	1	0	0	1	1	0	0						0	0	0	1	22
612024	2	1	1	0	1	0	1		1	5	11	0	1	1	0	1	0	32
612025	2	1	0	0	1	0	1	0						0	0	0	1	26
612026	2	0	1	1	0	0	1	1	1	4	12	0	0.958904	0	0	0	1	21
612027	2	0	0	1	1	0	0	1	1	2	12	0	1	0	0	0	0	32
612028	2	1	1	1	1	0	1	0						0	0	1	1	22
612029	2	1	0	0	1	0	1	0	1	3	8	0	1	1	0	0	0	28
612030	2	1	0	1	0	0	0	0	1	3	13	1	1	0	0	0	0	20
612031	2	1	1	0	1	0	1	1	1	3	23	1	1	1	1	1	0	39
612032	2	1	0	1	1	0	1	0	1	4	8	0	1	1	1	0	0	38
612033	2	1	0	1	1	0	1	0	1	3	5	0	1	1	0	0	0	23
612034	2	1	1	1	1	0	1	0	1	2	3	0	0.909091	0	0	0	0	27
612035	2	1	0	1	1	0	0	0						0	0	0	1	36
612036	2	0	1	1	1	0	0	0	1	3	8	0	1	0	1	0	0	24
612037	2	1	0	1	1	0	1	0	1	3	7	0	1	1	0	0	0	36
612038	2	0	1	1	1	0	1	0	1	2	12	0	1	1	1	0	1	34
612039	2	0	0	0	1	0	0	1	1	2	10	0	0.785714	0	0	0	1	32
612040	2	1	0	0	0	0	1	0	1	4	1	0	1	1	1	0	1	20
612041	2	1	0	0	0	1	1	0	1	4	7	0	0.4	0	1	0	0	23
612042	2	1	0	0	1	0	1	0	1	3			1	1	1	0	1	40
612043	2	0	1	1	1	0	1	0	1	3	2	0	1	1	0	0	0	26
612044	2	0	0	1	1	1	1	0	1	3	2	0	1	1	0	0	1	32
612045	2	1	0	1	1	0	1	0	1	2	16	1	1	1	1	1	0	24
612046	2	1	1	1	1	0	1	0	1	4	11	0	1	1	1	0	1	23
612047	2	1	1	0	1	1	1	0	1	3	8	0	1	1	1	0	0	23
612048	2	1	0	0	1	0	1	0	1	4	9	0	1	1	0	0	1	21
612049	2	1	0	0	0	1	0	0	1	4	13	1	1	0	0	0	0	18
612050	2	1	1	0	1	0	1	0	1	4	2	0	1	1	0	0	0	33
612051	2	0	1	1	0	0	0	0	1	3	12	0	1	1	0	0	0	24
612052	2	1	0	1	0	0	1	0	1	7	0	0	1	1	1	0	0	26
612053	2	1	0	1	1	0	1	0	1	4	0	0	1	1	0	0	0	24
612054	2	0	0	0	1	0	1							0	1	0	0	29
612055	2	0	0	0	1	0	1	0						0	1	0	0	30
612056	2	0	1	0	1	0	1	0	1	3			1	1	0	0	0	28
612057	2	0	0	1	1	0	1	0	1	2	7	0	1	1	0	0	0	20
612058	2	1	0	1	1	0	1	0	1	2	6	0	1	1	0	0	0	24
612059	2	1	0	0	1	0	0	0	1	2			1	1	0	1	0	27
612060	2	0	0	1	1	0	1	1						0	0	0	0	26
612061	2	1	1	0	1	0	0	1	1	2	5	0	1	1	1	0	0	40
612062	2	0	0	0	1	0	1	0						0	1	0	0	24
612063	2	0	0	1	1	0	1	0	1	4	6	0	1	1	0	1	1	37
612064	2	0	0	1	0	0	0	0						0	0	1	1	19
612065	2	0	1	1	0	0	0							0	0	1	0	20
612066	2	1	1	1	0	1	0	0						0	1	1	0	20
612067	2	1	0	0	1	0	1	0	1	5	9	0	1	1	0	0	0	44
612068	2	1	0	0	1	0	0	0	1	2	6	0	1	1	0	0	0	32
612069	2	1	0	1	1	0	1	0	1	3	4	0	1	1	0	0	0	23
612070	2	1	1	0	1	0	1	0	1	3	4	0	1	1	1	0	0	37
612071	2	1	1	1	1	0	1	1	1	5	0	0	1	1	1	1	0	26
612072	2	0	1	1	1	0	1	1						0	0	0	0	30
612073	2	1	1	0	1	0	1	0	1	3	13	1	1	1	1	0	0	28
612074	2	0	0	1	0	1	1	1	1	5	8	0	1	1	0	0	0	18
612075	2	1		0	1	0	1	0	1	3	13	1	1	1	1	0	0	28
612078	2	0	0	1	1	0	1	0						0	0	0	0	29
612079	2	1		0	1	0	1	0						0	0	0	1	33
612080	2	1	0	1	1	0	1	0	1	4	8	0	1	1	0	1	0	29
612081	2	1	0	0	1	0	1	0	1	4	2	0	1	1	0	0	0	32
612082	2	0	1	1	1	0	1	1	1	5	11	0	1	1	0	0	0	30
612083	2	0	1	0	1	0	1		1	2	19	1	1	1	1	0	0
612084	2	0	0	1	0	0	1	0	1	6	5	0	1	1	0	1	0	22
612085	2	1	1	1	0	1	0	0	0	0	23	1	0.909091	0	0	0	0	25
612086	2	1	1	1	1	0	1	0	1	4			1	1	0	1	1	33
612087	2	1	0	0	1	0	1	0	1	2	7	0	0.857143	0	0	0	0	25
612088	2	0	0	1	0	1	1	0	1	3	5	0	1	0	1	0	1	22
612089	2	1	0	1	1	0	1	0	1	0			0.714286	0	0	1	0	37
612090	2	1	1	1	0	0	1	0	1	4	2	0	1	1	1	1	1	19
612091	2	1	0	1	1	0	1	0						0	1	0	1	34
612092	2	1	0	0	1	0	1	0	1	4	19	1	1	1	0	1	0	33
612093	2	1	0	1	0	0	1	0						0	0	0	1	18
612094	2	1	0	1	1	0	0	0	1	4	1	0	1	1	0	0	0	26
612095	2	1	0	1	0	0	1	0	1	2	12	0	1	0	0	1	0	21
612096	2	1	1	1	1	0	1	0	1	1			0.866667	0	0	1	0	32
612097	2	0	0	1	0	0	0	0	1	3	2	0	1	0	0	1	0	23
612098	2	0	0	1	1	0	1	0	1	4	15	1	1	1	0	1	1	30
612099	2	0	1	1	1	0	1	0	1	6	3	0	1	1	0	1	0	18
612100	2	1	0	0	1	0	1	1	1	3	1	0	1	1	0	0	0	24
612101	2	1		1	1	0	1	0	1	3			1	1	0	0	0	23
